# Supplementary material
Source: Springer Nature journal article supplement (https://www.springermedizin.de/resource/supplementary/12916_2009_214_MOESM9_ESM.pdf/9599408)

**Id, Sex, Study name**

**Relative Risk  
95% CI**

**Relative Risk  
95% CI**

**1 M Lutheran Brotherhood**

**1.51 (1.03, 2.19)**

**3 M US Veterans**

**1.17 (0.88, 1.56)**

**5 M NHANES I**

**1.20 (0.50, 3.40)**

**7 M Williams and Horm 1977**

**1.32 (0.94, 1.84)**

**16 M Hayes et al 1994**

**1.00 (0.75, 1.33)**

**Total (95% CI)**

**1.20 (1.03, 1.40)**

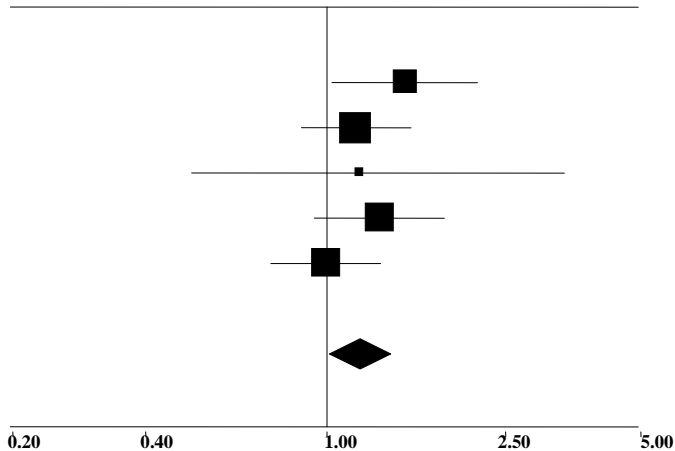

Supplement: MOESM9 [file 9599408]
